# Supplementary material
Source: publisher figshare collection journal article supplement (https://gsajournals.figshare.com/ndownloader/files/28102719)
Supplement: Supplementary file 1 [file 28102719]

B

A

C

|  | Cu | Mn | Cd | Mg | Fe | K | Zn | P | Ni | Ca | Sr | Rb | Mo | S | B |
| --- | --- | --- | --- | --- | --- | --- | --- | --- | --- | --- | --- | --- | --- | --- | --- |

**Figure S2.** Sources of variation for 15 elemental phenotypes in fresh sweet corn kernels from across locations (A), only NY (B), and only WI (C). The phenotypic variance of each trait was statistically separated into the following components: environment (Env), set within environment [Set(Env)], block within set within environment [Block(Set×Env)], genotype (Geno), genotype-by-environment interaction (Geno×Env), inductively coupled plasma mass spectrometry run (ICP), kernel sample (Sample), row within environment [Row(Env)], column within environment [Col(Env)], and residual error variance (Residual). Variance component estimates were calculated for all random effects from the full model (Equation 1).
